# Supplementary material
Source: MDPI journal article supplement (https://www.mdpi.com/2304-6740/11/10/398)
Supplement: s1 [file s1]

## Supplementary material

# Synthesis, Characterization, DNA Binding and Cytotoxicity of Copper(II) Phenylcarboxylate Complexes

Carlos Y. Fernández <sup>1</sup>, Analu Rocha <sup>2</sup>, Mohammad Azam <sup>3</sup>, Natalia Alvarez <sup>1</sup>, Kim Min <sup>4</sup>, Alzir A. Batista <sup>2</sup>, Antonio J. Costa-Filho <sup>5</sup>, Javier Ellena <sup>6</sup>, Gianella Facchin <sup>1,\*</sup>

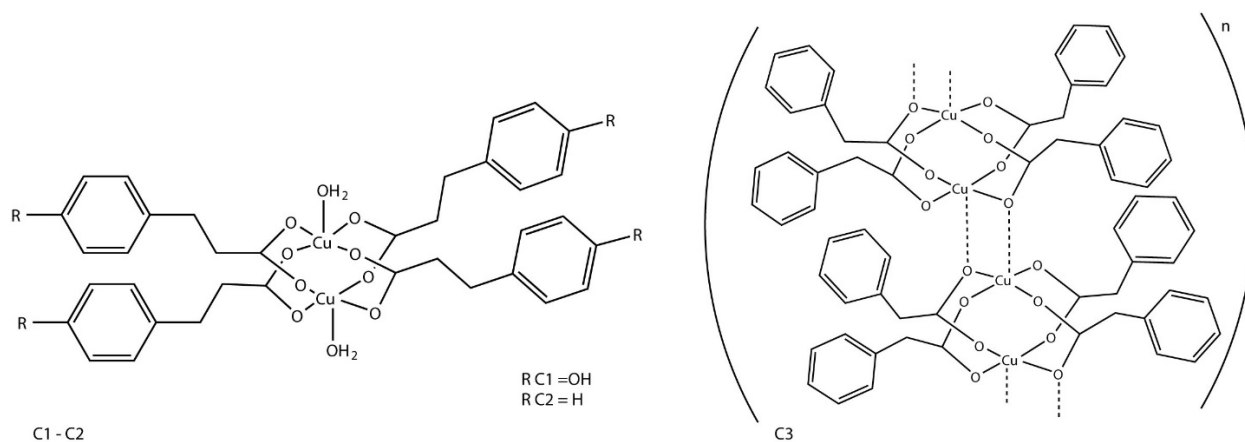

**Figure S1.** Scheme of the structures of the complexes.

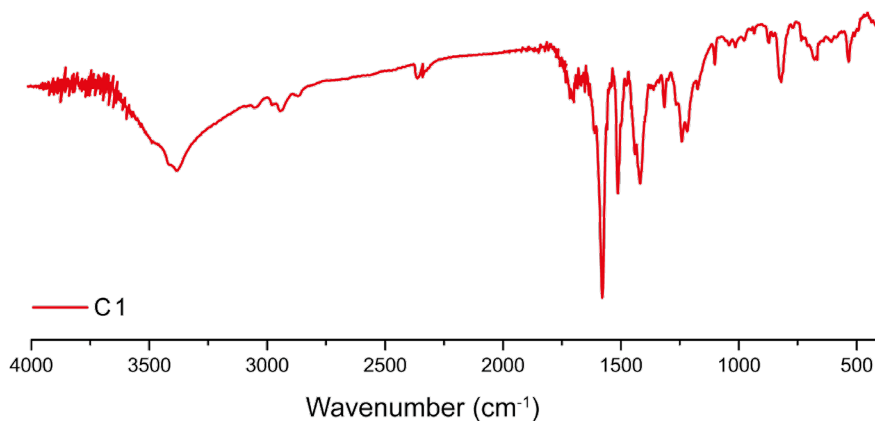

**Figure S2.** Infrared spectrum of complex C1.

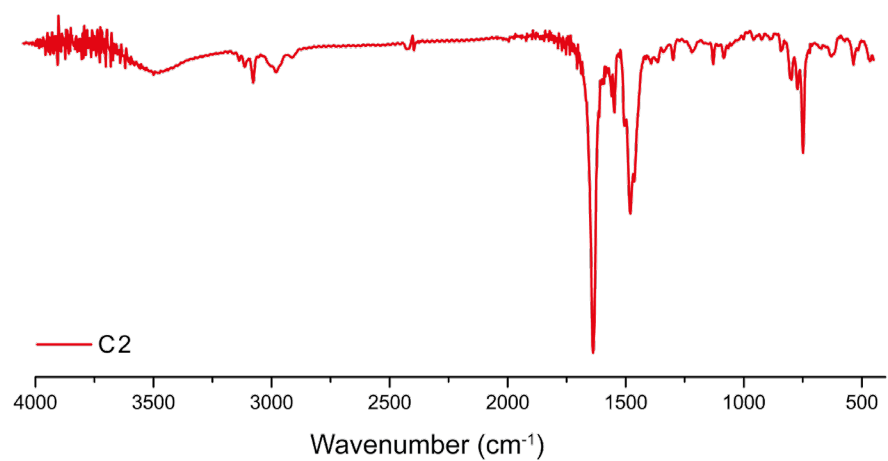

**Figure S3.** Infrared spectrum of complex **C2**.

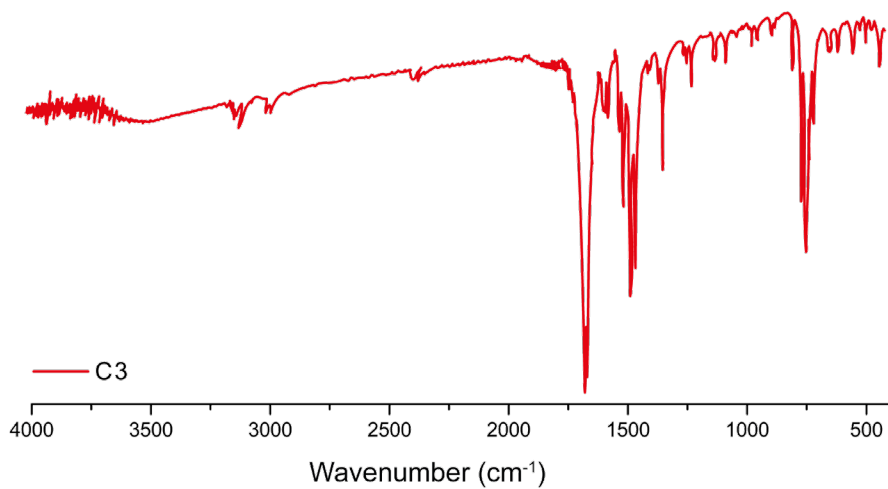

**Figure S4.** Infrared spectrum of complex **C3**.

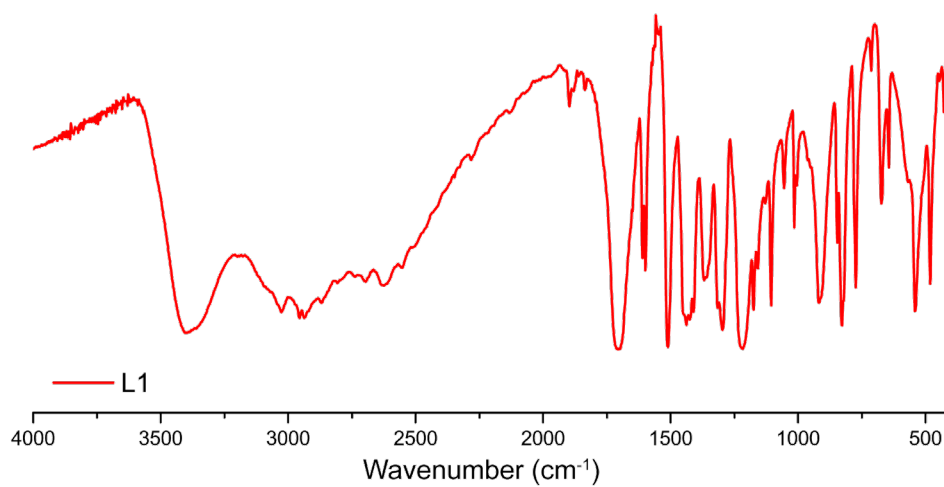

**Figure S5.** Infrared spectrum of 3-(4-hydroxyphenyl)propanoic acid (**L1**).

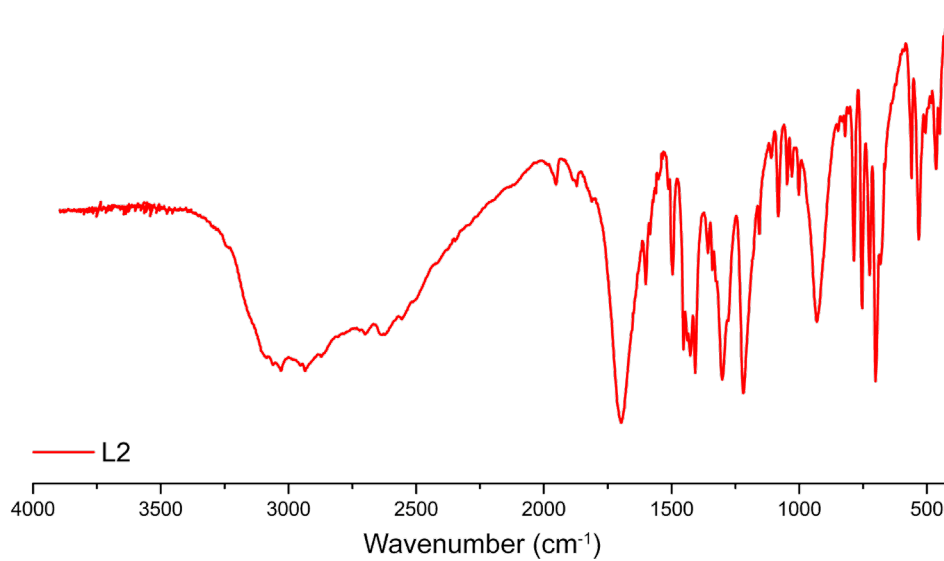

**Figure S6.** Infrared spectrum of propanoic acid (**L2**).

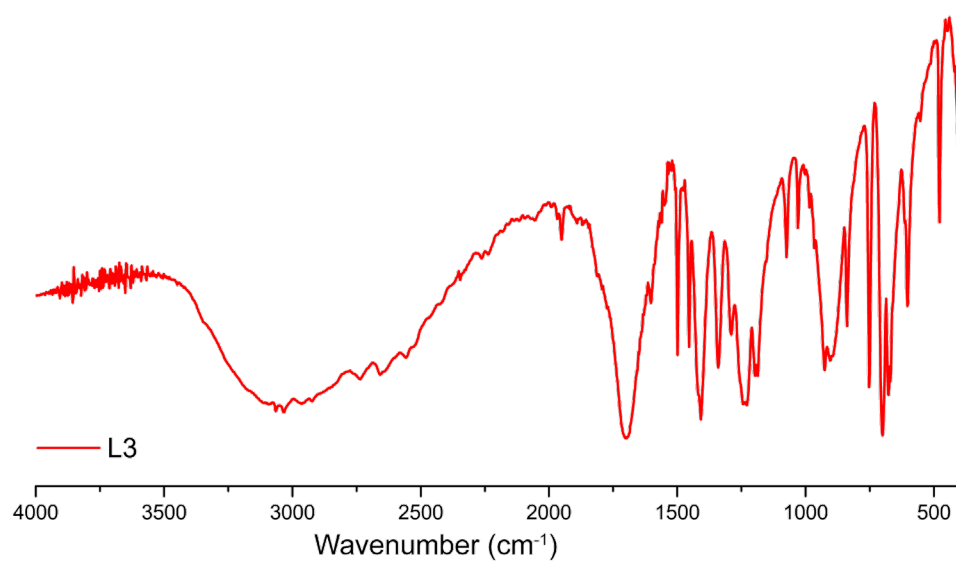

**Figure S7.** Infrared spectrum of phenylacetic acid (**L3**).

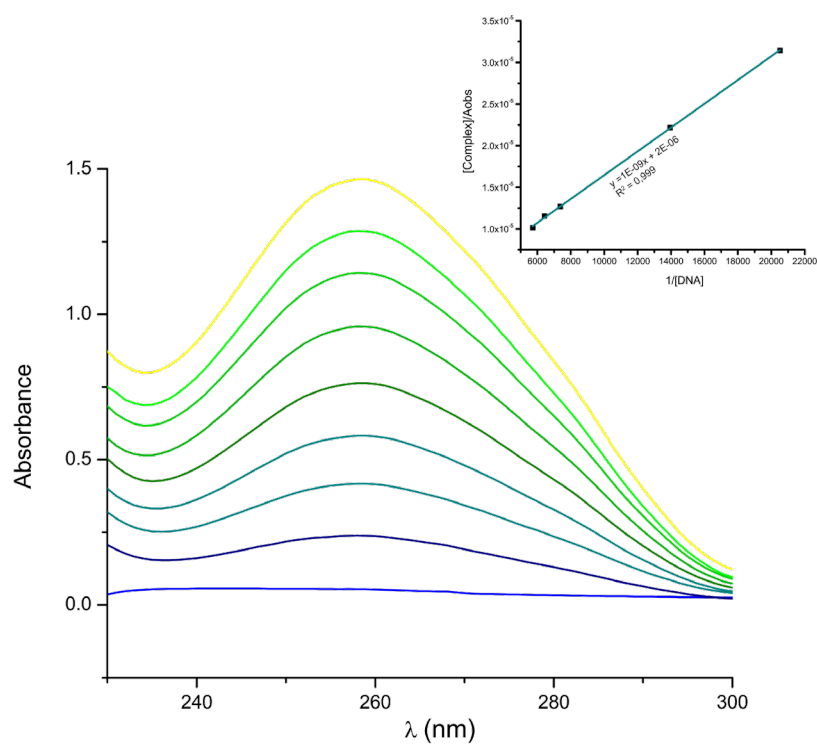

**Figure S8.** UV spectra of **C2** with increasing amounts of DNA. Inset: [complex]/Aobs as a function of 1/[DNA] plot with regression parameters.

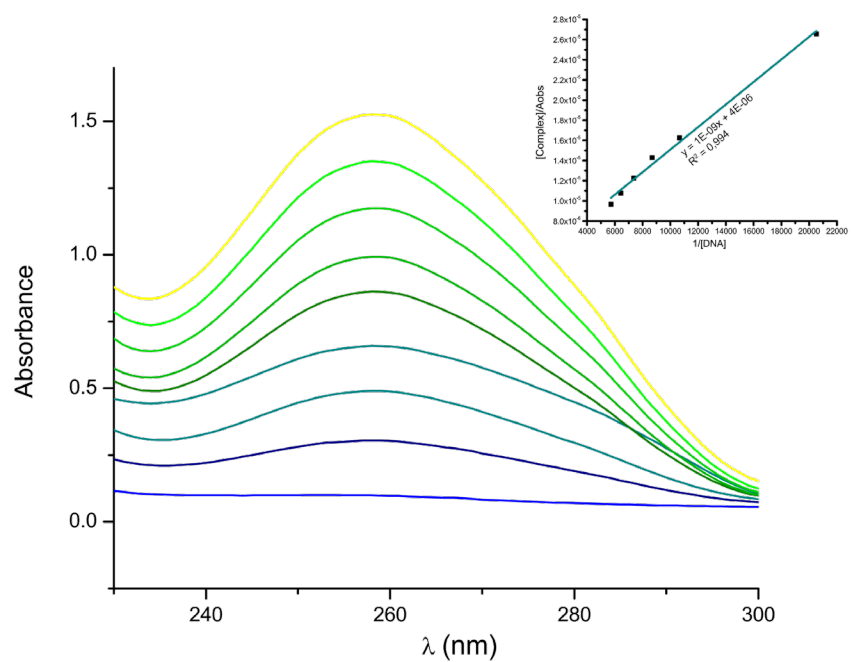

**Figure S9.** UV spectra of **C3** with increasing amounts of DNA. Inset:  $[\text{complex}]/A_{\text{obs}}$  as a function of  $1/[\text{DNA}]$  plot with regression parameters.
